# Supplementary material for: A Strategy toward Realizing Narrow Line with High Electrical Conductivity by Electrohydrodynamic Printing
Source: MDPI journal article supplement (doi:10.3390/membranes12020141), 2022-01-24
Supplement: s1 [file s1]

## Supplementary Materials

# A Strategy toward Realizing Narrow Line with High Electrical Conductivity by Electrohydrodynamic Printing

Hongfu Liang <sup>1</sup>, Rihui Yao <sup>1</sup>, Guanguang Zhang <sup>1</sup>, Xu Zhang <sup>1</sup>, Zhihao Liang <sup>1</sup>, Yuexin Yang <sup>1</sup>, Honglong Ning <sup>1,\*</sup>, Jinyao Zhong <sup>1</sup>, Tian Qiu <sup>2,\*</sup> and Junbiao Peng <sup>1</sup>

<sup>1</sup> State Key Laboratory of Luminescent Materials and Devices, Institute of Polymer Optoelectronic Materials and Devices, South China University of Technology, Guangzhou 510640, China; 201530291429@mail.scut.edu.cn (H.L.); yaorihui@scut.edu.cn (R.Y.); msgg-zhang@mail.scut.edu.cn (G.Z.); 201921020680@mail.scut.edu.cn (X.Z.); 201530291443@scut.edu.cn (Z.L.); msyangyx@mail.scut.edu.cn (Y.Y.); 202010103138@mail.scut.edu.cn (J.Z.); psjbpeng@scut.edu.cn (J.P.)

<sup>2</sup> Department of Intelligent Manufacturing, Wuyi University, Jiangmen 529020, China

\* Correspondence: ninghl@scut.edu.cn (H.N.); qitian@ustc.edu (T.Q.); Tel.: +86-20-8711-4525 (H.N.)

**Citation:** Liang, H.; Yao, R.; Zhang, G.; Zhang, X.; Liang, Z.; Yang, Y.; Ning, H.; Zhong, J.; Qiu, T.; Peng, J. A Strategy toward Realizing Narrow Line with High Electrical Conductivity by Electrohydrodynamic Printing. *Membranes* **2022**, *12*, 141. <https://doi.org/10.3390/membranes12020141>

Academic Editor: Jasmina Casals Terre

Received: 20 December 2021

Accepted: 17 January 2022

Published: 24 January 2022

**Publisher's Note:** MDPI stays neutral with regard to jurisdictional claims in published maps and institutional affiliations.

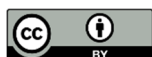

**Copyright:** © 2022 by the authors. Submitted for possible open access publication under the terms and conditions of the Creative Commons Attribution (CC BY) license (<https://creativecommons.org/licenses/by/4.0/>).

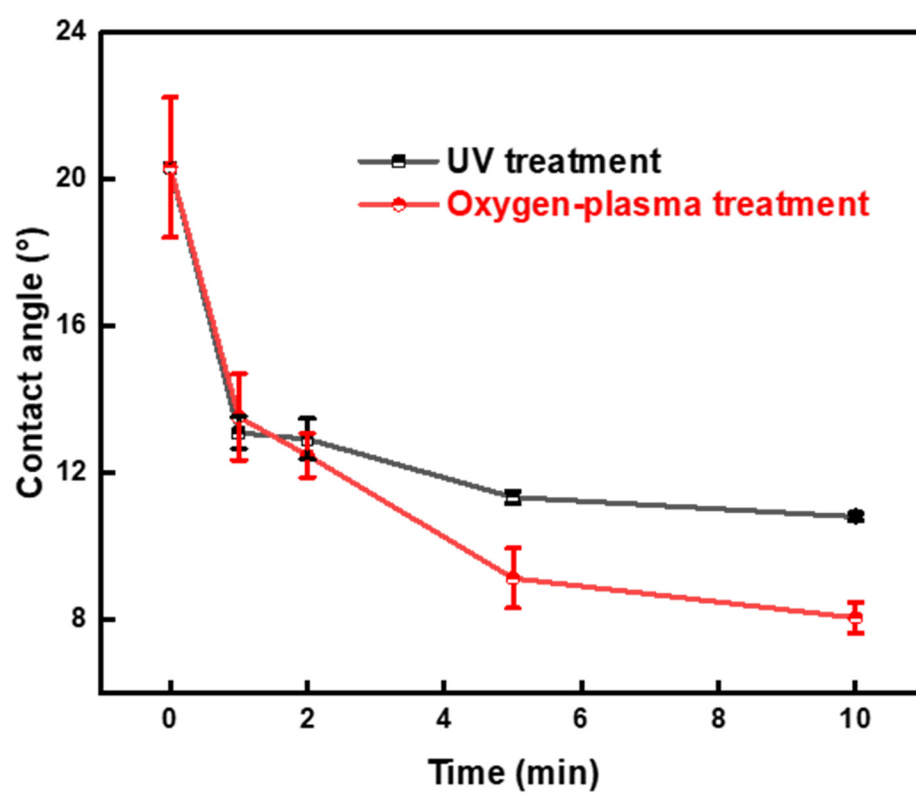

Figure S1. Relationship between contact angle and treatment time.
